# Supplementary material for: Crystal phase transformation and doping-induced blue emission of Eu-doped InOOH and cubic/corundum-type rhombohedral In2O3nanowires
Source: Royal Society of Chemistry journal article supplement (doi:10.1039/c4ce02111h), 2014-12-09
Supplement: c4ce02111h1.pdf [file c4ce02111h1.pdf]

## Supporting Information

### **Crystal Phase Transformation and Doping-Induced Blue Emission of Eu-doped InOOH and Cubic/Corundum-Type Rhombohedral In<sub>2</sub>O<sub>3</sub> Nanowires**

Won Joo Kim,<sup>1</sup> Bong Ki Min,<sup>2</sup> Debabrata Pradhan,<sup>3</sup> Youngku Sohn<sup>1,\*</sup>

<sup>1</sup>Department of Chemistry, Yeungnam University, Gyeongsan 712-749,  
Republic of Korea

<sup>2</sup>Centre for Research Facilities, Yeungnam University, Gyeongsan, Gyeongbuk  
712-749, Republic of Korea

<sup>3</sup>Materials Science Centre, Indian Institute of Technology, Kharagpur 721 302,  
W.B., India

\* Corresponding author e-mail: [youngkusohn@ynu.ac.kr](mailto:youngkusohn@ynu.ac.kr)

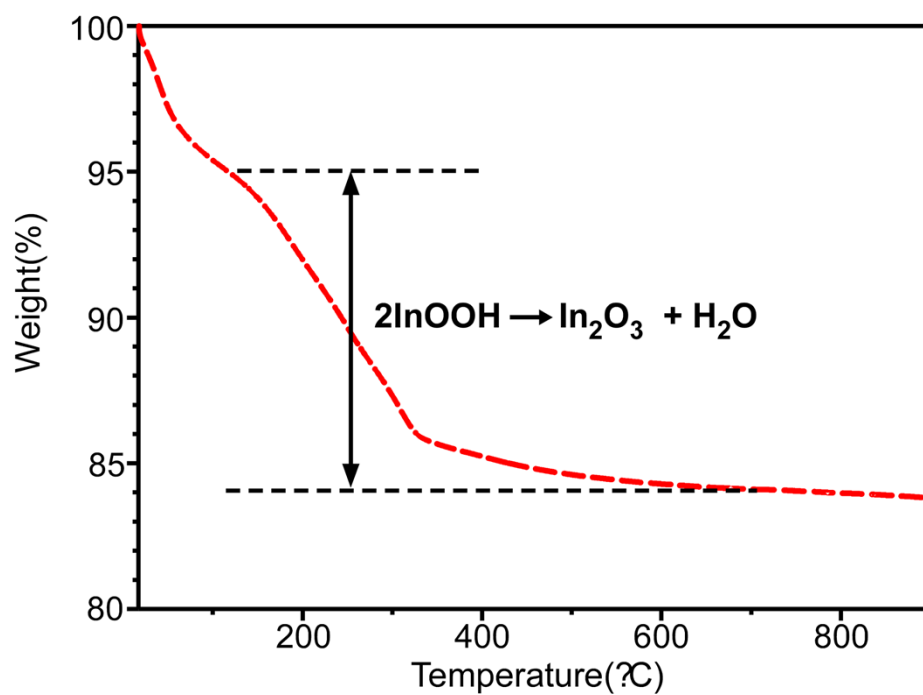

**Fig.S1.** Typical thermogravimetric analysis curve of InOOH wires.

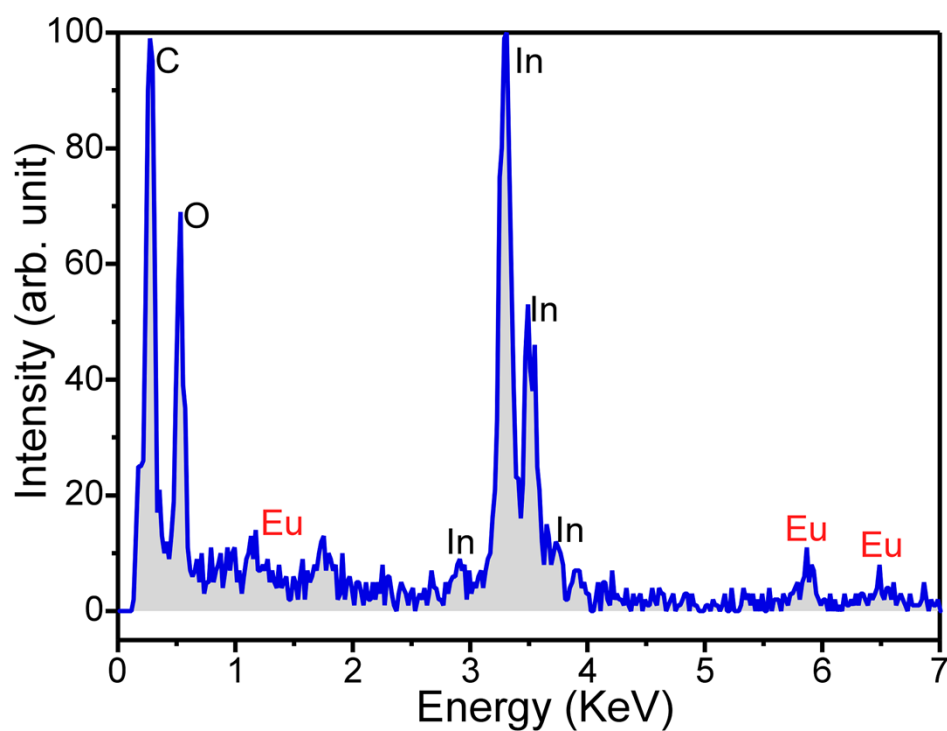

**Fig. S2.** EDX of 10 mol% Eu doped  $\text{In}_2\text{O}_3$ .

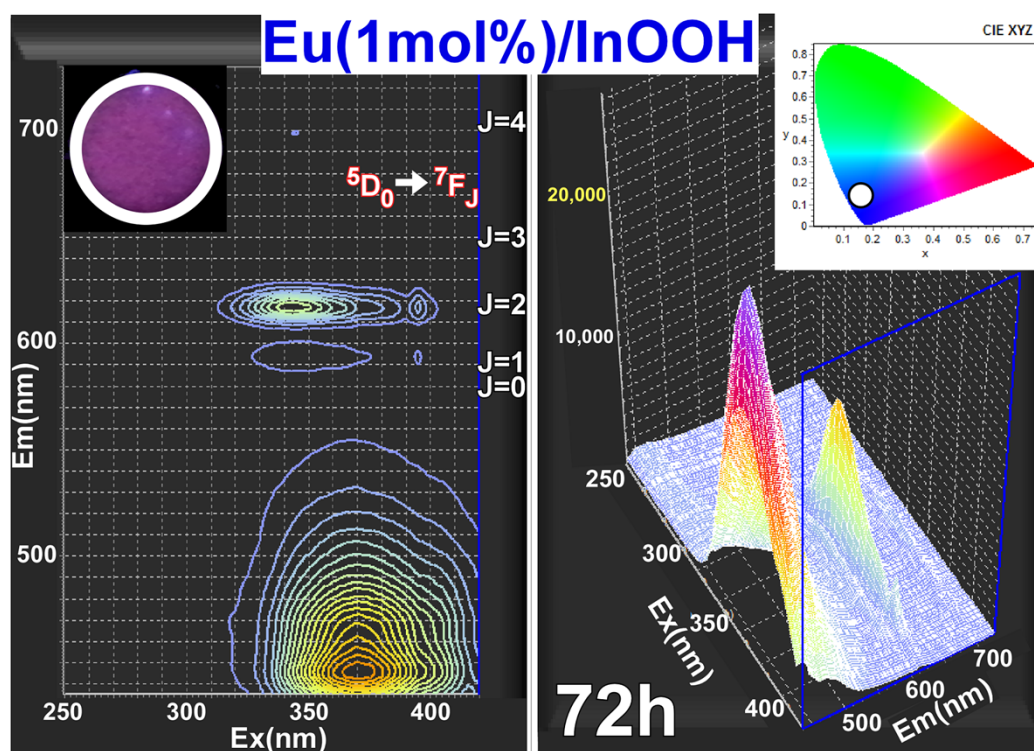

**Fig. S3.** 2D and 3D-PL profiles of the as-prepared 1 mol% Eu-doped InOOH nanowires synthesized for a longer reaction duration of 72 h. Inset photo (left) shows the color of the sample under UV irradiation. The CIE color coordinate (right) is for the emission spectra at an excitation wavelength of 370 nm.



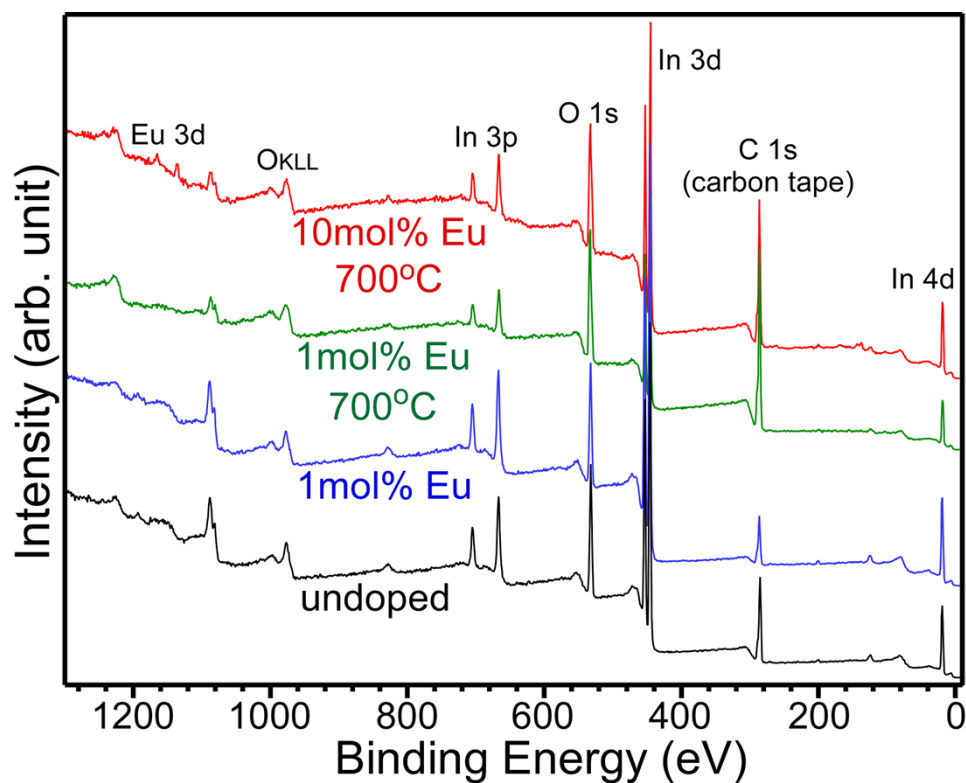

**Fig. S5.** Survey XPS spectra of undoped and 1mol% Eu-doped InOOH, and 700°C-annealed 1 and 10mol% Eu-doped In<sub>2</sub>O<sub>3</sub> samples.

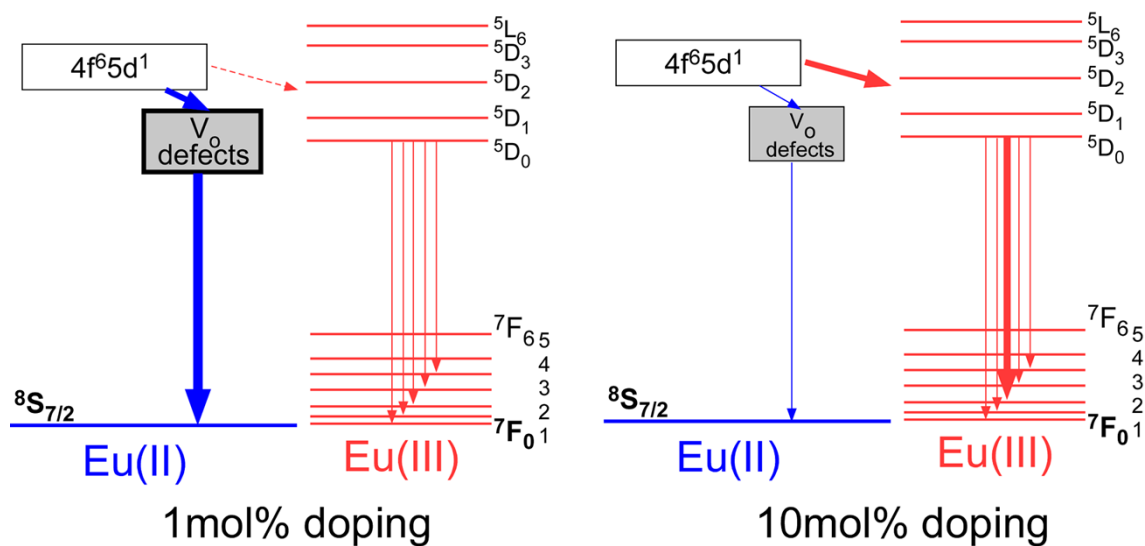

**Fig. S6.** Energy transfer and luminescence mechanism for 1 and 10 mol% Eu-doped samples.
